# Supplementary material for: Factors Influencing Childhood Influenza Vaccination: A Systematic Review
Source: MDPI journal article supplement (doi:10.3390/vaccines12030233), 2024-02-23
Supplement: s1 [file s1]

**Table S1. Search strategies***Medline*

| # | Searches                                                                                                                                                                                                                                                                                                                                                                                                                                                                                                                                                                                                                                                                        | Results |
|---|---------------------------------------------------------------------------------------------------------------------------------------------------------------------------------------------------------------------------------------------------------------------------------------------------------------------------------------------------------------------------------------------------------------------------------------------------------------------------------------------------------------------------------------------------------------------------------------------------------------------------------------------------------------------------------|---------|
| 1 | “Influenza.mp” [Keyword] or “exp Influenza Human/”[Mesh]                                                                                                                                                                                                                                                                                                                                                                                                                                                                                                                                                                                                                        | 96528   |
| 2 | “exp Influenza Vaccines/”[Mesh] or “vaccine.mp.”[Keyword] or “exp Vaccination/” [Mesh] or “vaccination.mp.”[Keyword] or “exp Immunization/”[Mesh] or “immunization.mp.”[Keyword]                                                                                                                                                                                                                                                                                                                                                                                                                                                                                                | 351053  |
| 3 | “exp Attitude/”or “attitude.mp.”or “view.mp.”or<br>“idea.mp.”or“opinion.mp. or exp Attitude/” or “exp Decision Making/ or decision.mp.”or “exp Choice Behavior/ or choice.mp.”or<br>“confidence.mp.”or “trust.mp.”or “exp Trust/”or “acceptance.mp.” or<br>“exp Health Knowledge, Attitudes, Practice/ or exp Vaccines/ or hesitancy.mp.”or “exp Awareness/ or awareness.mp.”or “belief.mp.”or<br>“exp Intention/ or intention.mp.”or “perception.mp. or exp Perception/”or “barrier.mp.”or “facilitator.mp.”or “willingness.mp.”or<br>“fear.mp. or exp Fear/”or “suspicious.mp.”or “exp Vaccination Refusal or refusal.mp.” or “delay.mp.” or “opposition.mp.”or “boycott.mp.” | 2847838 |
| 4 | “caregiver.mp. or exp caregiver/”or “parent.mp. or exp parent/”or “exp parental attitude/ or parental.mp. or exp parental behavior/”or“children.mp. or exp child/”                                                                                                                                                                                                                                                                                                                                                                                                                                                                                                              | 2209128 |
| 5 | Step 1 and Step 2 and Step 3 and Step 4                                                                                                                                                                                                                                                                                                                                                                                                                                                                                                                                                                                                                                         | 2451    |

*Embase*

| # | Searches                                                                                                                    | Results |
|---|-----------------------------------------------------------------------------------------------------------------------------|---------|
| 1 | “influenza.mp.”or“exp Influenza, Human/”                                                                                    | 156831  |
| 2 | “exp Influenza Vaccines/ or vaccine.mp.” or “exp Vaccination/ or vaccination.mp.”or “exp Immunization/ or immunization.mp.” | 553729  |

|   |                                                                                                                                                                                                                                                                                                                                                                                                                                                                                                                                                                                                                                                                                             |         |
|---|---------------------------------------------------------------------------------------------------------------------------------------------------------------------------------------------------------------------------------------------------------------------------------------------------------------------------------------------------------------------------------------------------------------------------------------------------------------------------------------------------------------------------------------------------------------------------------------------------------------------------------------------------------------------------------------------|---------|
| 3 | “exp Attitude/”or “attitude.mp.”or “view.mp.”or<br>“idea.mp.”or“opinion.mp. or exp Attitude/” or “exp Decision Making/<br>or decision.mp.”or “exp Choice Behavior/ or choice.mp.”or<br>“confidence.mp.”or “trust.mp.”or “exp Trust/”or “acceptance.mp.” or<br>“exp Health Knowledge, Attitudes, Practice/ or exp Vaccines/ or<br>hesitancy.mp.”or “exp Awareness/ or awareness.mp.”or “belief.mp.”or<br>“exp Intention/ or intention.mp.”or “perception.mp. or exp<br>Perception/”or “barrier.mp.”or “facilitator.mp.”or “willingness.mp.”or<br>“fear.mp. or exp Fear/”or “suspicious.mp.”or “exp Vaccination Refusal<br>or refusal.mp.” or “delay.mp.” or “opposition.mp.”or “boycott.mp.” | 6827847 |
| 4 | “caregiver.mp. or exp caregiver/”or “parent.mp. or exp parent/”or “exp<br>parental attitude/ or parental.mp. or exp parental<br>behavior/”or“children.mp. or exp child/”                                                                                                                                                                                                                                                                                                                                                                                                                                                                                                                    | 3496737 |
| 5 | Step 1 and Step 2 and Step 3 and Step 4                                                                                                                                                                                                                                                                                                                                                                                                                                                                                                                                                                                                                                                     | 994     |

*PsycINFO*

| # | Searches                                                                                                                                                                                                                                                   | Results |
|---|------------------------------------------------------------------------------------------------------------------------------------------------------------------------------------------------------------------------------------------------------------|---------|
| 1 | “influenza.mp.”or“exp Influenza, Human/”                                                                                                                                                                                                                   | 2500    |
| 2 | “exp Influenza Vaccines/ or vaccine.mp.” or “exp Vaccination/ or<br>vaccination.mp.”or “exp Immunization/ or immunization.mp.”                                                                                                                             | 7471    |
| 3 | “exp Attitude/”or “attitude.mp.”or “view.mp.”or<br>“idea.mp.”or“opinion.mp. or exp Attitude/” or “exp Decision Making/<br>or decision.mp.”or “exp Choice Behavior/ or choice.mp.”or<br>“confidence.mp.”or “trust.mp.”or “exp Trust/”or “acceptance.mp.” or | 1402560 |

|   |                                                                                                                                                                                                                                                                                                                                                                                                                |        |
|---|----------------------------------------------------------------------------------------------------------------------------------------------------------------------------------------------------------------------------------------------------------------------------------------------------------------------------------------------------------------------------------------------------------------|--------|
|   | “exp Health Knowledge, Attitudes, Practice/ or exp Vaccines/ or hesitancy.mp.”or “exp Awareness/ or awareness.mp.”or “belief.mp.”or “exp Intention/ or intention.mp.”or “perception.mp. or exp Perception/”or “barrier.mp.”or “facilitator.mp.”or “willingness.mp.”or “fear.mp. or exp Fear/”or “suspicious.mp.”or “exp Vaccination Refusal or refusal.mp.” or “delay.mp.” or “opposition.mp.”or “boycott.mp.” |        |
| 4 | “caregiver.mp. or exp caregiver/”or “parent.mp. or exp parent/”or “exp parental attitude/ or parental.mp. or exp parental behavior/”or“children.mp. or exp child/”                                                                                                                                                                                                                                             | 618533 |
| 5 | Step 1 and Step 2 and Step 3 and Step 4                                                                                                                                                                                                                                                                                                                                                                        | 92     |

#### *CINAHL Plus*

| # | Searches                                                                                                                                                                                                                                                                                             | Results |
|---|------------------------------------------------------------------------------------------------------------------------------------------------------------------------------------------------------------------------------------------------------------------------------------------------------|---------|
| 1 | “Influenza* ”or“flu ” or MH "Influenza, Human+ ” or MH "Influenza Vaccine"                                                                                                                                                                                                                           | 29570   |
| 2 | “ vaccin* ” or “ immuniz* ”or “ immunis* ” or MH "Immunization+"                                                                                                                                                                                                                                     | 66487   |
| 3 | “attitude”or “view”or “idea”or“opinion” or “decision”or “choice”or “confidence”or “trust”or “acceptance” or “hesitancy”or “awareness”or “belief”or “intention”or “perception”or “barrier”or “facilitator”or “willingness”or “fear”or “suspicious”or “refusal” or “delay” or “opposition”or “boycott” | 1130525 |
| 4 | “caregiver* ”or “parent* ”or MH "Caregiver Burden") OR (MH "Caregiver Attitudes" ) or (MH "Parent-Infant Relations+") OR (MH "Parent-Child Relations+") OR (MH "Parental Attitudes+") OR (MH "Parental Behavior") OR (MH "Child+") OR "child"                                                        | 752951  |
| 5 | Step 1 and Step 2 and Step 3 and Step 4                                                                                                                                                                                                                                                              | 817     |

#### *Web of Science*

| # | Searches                                                                                                                                                                                                                                                                                                                                 | Results |
|---|------------------------------------------------------------------------------------------------------------------------------------------------------------------------------------------------------------------------------------------------------------------------------------------------------------------------------------------|---------|
| 1 | IELDALL FS: (Influenza)<br>DocType=All document types; Language=All languages;                                                                                                                                                                                                                                                           | 103510  |
| 2 | ALL=(vaccin*) OR ALL=(immuniz*)OR ALL=(immunis*)<br>DocType=All document types; Language=All languages;                                                                                                                                                                                                                                  | 416128  |
| 3 | (intention) OR ALL FIELDS: (perception) OR ALL FIELDS: (barrier) OR ALL FIELDS: (facilitator) OR ALL FIELDS: (willingness) OR ALL FIELDS: (fear) OR ALL FIELDS: (suspicious) OR ALL FIELDS: (refusal) OR ALL FIELDS: (delay) OR ALL FIELDS: (opposition) OR ALL FIELDS: (boycott)<br>DocType=All document types; Language=All languages; | 6647928 |
| 4 | ALL=(parent*) OR ALL=(child*) OR ALL=(caregiver)<br>DocType=All document types; Language=All languages;                                                                                                                                                                                                                                  | 2862293 |
| 5 | Step 1 and Step 2 and Step 3 and Step 4                                                                                                                                                                                                                                                                                                  | 1905    |

#### CNKI

| # |                                                                                                                                                                                                                                                                                                                               |     |
|---|-------------------------------------------------------------------------------------------------------------------------------------------------------------------------------------------------------------------------------------------------------------------------------------------------------------------------------|-----|
| 1 | SUBJECT=流感+流感疫苗<br>Translation: SUBJECT=influenza+ influenza vaccine                                                                                                                                                                                                                                                          | /   |
| 2 | SUBJECT=态度+观点+想法+意见+决定+选择+信心+信任+接受+犹豫+意识+信念+意图+观念+障碍+促进+意愿+恐惧+怀疑+拒绝+延误+反对+抵制<br>Translation:<br>SUBJECT= attitude+view+idea+opinion+decision+choice<br>+confidence+trust+acceptance+hesitancy+awareness+belief+intention+perc<br>eption+barrier+facilitator+willingness+fear+suspicious+refusal+delay+oppo<br>sition+boycott” | /   |
| 3 | SUBJECT=家长+父母+监护人+儿童+婴幼儿+幼儿<br>Translation:<br>SUBJECT= parent + caregiver + children + infants + young children                                                                                                                                                                                                              | /   |
| 4 | Step 1 and Step 2 and Step 3                                                                                                                                                                                                                                                                                                  | 449 |

#### VIP

| # |                                                                      |   |
|---|----------------------------------------------------------------------|---|
| 1 | SUBJECT=流感+流感疫苗<br>Translation: SUBJECT=influenza+ influenza vaccine | / |

|   |                                                                                                                                                                                                                                                                                                                                  |     |
|---|----------------------------------------------------------------------------------------------------------------------------------------------------------------------------------------------------------------------------------------------------------------------------------------------------------------------------------|-----|
| 2 | <p>SUBJECT=态度+观点+想法+意见+决定+选择+信心+信任+接受+犹豫+意识+信念+意图+观念+障碍+促进+意愿+恐惧+怀疑+拒绝+延误+反对+抵制</p> <p>Translation:</p> <p>SUBJECT= attitude+view+idea+opinion+decision+choice+confidence+trust+acceptance+hesitancy+awareness+belief+intention+perception+barrier+facilitator+willingness+fear+suspicious+refusal+delay+opposition+boycott”</p> | /   |
| 3 | <p>SUBJECT=家长+父母+监护人+儿童+婴幼儿+幼儿</p> <p>Translation:</p> <p>SUBJECT= parent + caregiver + children + infants + young children</p>                                                                                                                                                                                                  | /   |
| 4 | Step 1 and Step 2 and Step 3                                                                                                                                                                                                                                                                                                     | 261 |
