# Supplementary material for: Factors Influencing Childhood Influenza Vaccination: A Systematic Review
Source: MDPI journal article supplement (doi:10.3390/vaccines12030233), 2024-02-23
Supplement: s1 [file s1]

| <b>Non-biomedical factors</b>                          | <b>Application/examples</b>                                                                                                                                                |
|--------------------------------------------------------|----------------------------------------------------------------------------------------------------------------------------------------------------------------------------|
| <b>Knowledge</b>                                       |                                                                                                                                                                            |
| Knowledge                                              | The participant's knowledge about the specific infection                                                                                                                   |
| Awareness                                              | The participant's awareness of influenza as a health threat on individual or on the society as a whole                                                                     |
| <b>Attitudes towards influenza vaccine</b>             |                                                                                                                                                                            |
| Attitudes towards influenza vaccination behaviors      | The participant's accepting attitudes towards childhood influenza vaccination                                                                                              |
| Self-efficacy                                          | The participant's perception of his/her or others' competence in engaging in vaccinating their children against influenza                                                  |
| <b>Perceptions of influenza and influenza vaccines</b> |                                                                                                                                                                            |
| Perceived susceptibility                               | Self-rated health status<br>The participant's assessment/                                                                                                                  |
| Perceived severity                                     | perception of the severity of the situation regarding the infection (eg, self-diagnosed symptoms experienced)<br>The participant's assessment/                             |
| Perceived benefits                                     | perception of the benefit of receiving influenza vaccination (e.g., considering influenza vaccination to boost immunity) (misconceptions)<br>The participant's assessment/ |
| Perceived barriers                                     | perception of barriers to engaging in influenza vaccination (e.g., health insurance and knowledge of current policy)                                                       |
| Norm                                                   | Participants' view of how others treat illnesses                                                                                                                           |
| <b>Cue to action</b>                                   |                                                                                                                                                                            |
| Symptoms                                               | Presence of fever                                                                                                                                                          |
| Information sources                                    | The flow of information exchange between healthcare workers, the public and the media, etc                                                                                 |
| Emotion                                                | Moods and positive or negative reactions towards vaccination or non-vaccination, including worry, anxieties, and so on                                                     |
| <b>Individual characteristics</b>                      |                                                                                                                                                                            |
| Age                                                    | The age of the participant                                                                                                                                                 |

|                           |                                                                                                                                                               |
|---------------------------|---------------------------------------------------------------------------------------------------------------------------------------------------------------|
| Gender                    | The gender of the participant                                                                                                                                 |
| Education                 | The education level of the participant                                                                                                                        |
| Income                    | The household income or monthly allowance of the participant                                                                                                  |
| Vaccination history       | Influenza vaccination behavior of family members during past influenza seasons                                                                                |
| <b>Contextual factors</b> |                                                                                                                                                               |
| Location                  | The rural/urban of residence of the participant                                                                                                               |
| Region                    | Region of residence of the participant<br>—geographic area or economic development stage                                                                      |
| Policy                    | Health policy or vaccination program that might affect access to influenza vaccine and financial incentives for recommending influenza vaccine of vaccinators |
| Access                    | The degree of fit between the user and the vaccination service, including accessibility, availability, acceptability, affordability, and adequacy.            |

---
