# Supplementary material for: Factors Influencing Childhood Influenza Vaccination: A Systematic Review
Source: Vaccines (Basel). 2024 Feb 23;12(3):233. doi: 10.3390/vaccines12030233 (PMC10975121; doi:10.3390/vaccines12030233)
Supplement: Supplementary file 1 [file vaccines-12-00233-s001.zip]

Archive with 4 entries (4 files):
- supplemental table S1.pdf
- supplemental table S2.xlsx
- supplemental table S3.xlsx
- supplemental table S4.pdf
