# Supplementary material for: Factors Influencing Childhood Influenza Vaccination: A Systematic Review
Source: Vaccines (Basel). 2024 Feb 23;12(3):233. doi: 10.3390/vaccines12030233 (PMC10975121; doi:10.3390/vaccines12030233)
Supplement: Supplementary file 1 [file vaccines-12-00233-s001.zip › supplemental table S2.xlsx]

## Sheet: Supplement 2.1. 
Supplement 2.1. Appraisal – quantitative (Cross sectional study)																		·
	Research question and study design				Validity and reliability		Format					Instructions			Piloting			Sampling		Distribution, administration and response				Coding and analysis			Results			Conclusions and discussion		Quality appraisal
Title	What information did the researchers seek to obtain?	Appropriateness of questionnaire	Any better existing measures and justification for newly developed measure	Seeking views of consumers on the study design	Claims for validity of instrument	Claims for reliability of instrument	Appropriateness of the title of the questionnaire	Appropriateness of the questionnaire format	Non-threatening questions at the beginning of the measure and sensitive ones near the end?	Briefness of the questionnaire	Participants friendliness	Adequate instructions in questionnaire for completion	Instructions for how to return the questionnaire	Explanation of the research in questionnaire	Was the questionnaire adequately piloted in terms of the method and means of administration, on people who were representative of the study population?	Piloting exercise	Change for instrument after piloting	Representativeness of the sampling frame	Instrument suitable for all participants	How was the questionnaire distributed?	How was the questionnaire administered?	Reporting response rates	Discussing potential response biases	Appropriateness of analysis	Measures to maintain the accuracy of the data	Evidence of data dredging	Reporting all relevant data	Reporting non-significant results	Adequately interpret qualitative results	Appropriate link between the data and conclusions	Placing the findings within the wider body of knowledge in the field
Xu, L., 2017	To evaluate the level of seasonal influenza vaccination coverage in 2014-15 and 2015-16 seasons among kindergarten children in Xining City, and to explore potential factors	Yes	No	No	No	No	Yes	Yes	Yes	Yes	Yes	Yes	Yes	Yes	No	NO	NO	Yes	Yes	Researchers recruited parent for each child through teachers, and used a self-administered questionnaire for investigation in the study kindergartens	Researchers recruited parent for each child through teachers, and used a self-administered questionnaire for investigation in the study kindergartens	No	No	Multivariate logistic regression/Yes	Children’s immunization records and checking self-reported vaccination time/Yes	No	Yes	Yes	NA	Yes	Yes	0.645161
Chen, C.H., 2015	To identify health belief constructs that were predictive of the intention to have children vaccinated against influenza.	Yes	Yes	No	Yes	Yes	Yes	Yes	Yes	Yes	Yes	Yes	NR	Yes	Yes	Questionnaire pretests were performed by 32 recruited respondents with appropriate qualifications from a community health center in Taipei City during May 24–26, 2011	NR	Yes	Yes	Questionnaire was delivered to subjects	NR	Yes	No	Multivariate logistic regression	NR	No	Yes	Yes	NA	Yes	Yes	0.741935
Han, Y., 2019	Investigate the determinants of parents’ intentions to vaccinate their kindergarten children against seasonal influenza if the free policy were implemented	Yes	Yes	No	Yes	Yes	Yes	Yes	Yes	Yes	Yes	Yes	Yes	Yes	No	NA	NA	Yes	Yes	Questionnaires were delivered to the parents by school physicians.	Researchers deleted all identifying information and kept the questionnaires as restricted data.	Yes	No	Skewed logistic model (Scobit)	Yes	Yes	Yes	Yes	NA	Yes	Yes	0.806452
Zeng, Y., 2019	Investigate parents’ perceptions on influenza vaccina; and to explore potential factors promoting parents to vaccinate their children	Yes	Yes	No	Yes	Yes	Yes	Yes	Yes	Yes	Yes	Yes	NR	Yes	No	NA	NA	Yes	Yes	NR	NR	No	No	Multiple logistic regressions	No	No	Yes	Yes	NA	Yes	Yes	0.612903
Low, M.S.F., 2017	To estimate influenza vaccine coverage among children aged 6 months to 5 years in Singapore and investigate factors associated with child influenza vaccination.	Yes	Yes	No	No	No	Yes	Yes	Yes	Yes	Yes	Yes	Yes	Yes	No	NA	NA	Yes	Yes	Disseminate information about the study to parents and a link to an online survey	The anonymous, online survey questionnaire was developed using Qualtrics software (Qualtrics Labs, Inc.)	Yes	No	Poisson model with robust standard errors	No	No	Yes	Yes	NA	Yes	Yes	0.677419
Lau, J.T.F., 2018	To investigate prevalence and associated factors of IV among Chinese children aged 12–23 months in Hong Kong	Yes	Yes	No	Yes	Yes	Yes	Yes	Yes	Yes	Yes	Yes	Yes	Yes	Yes	No	No	Yes	Yes	The nurses of the MCHC performed eligibility screening and referred prospective participants to approach interviewers	Anonymous face-to-face interviews of about 15 minutes were administered in a private room	No	No	Multivariate logistic regression analyses	No	No	Yes	Yes	NA	Yes	Yes	0.741935
Offutt-Powell, T.N., 2014	To estimate the proportion of children in licensed daycares who were vaccinated against influenza during the 2010–2011 influenza season, and explore the relationship between parental risk perception and influenza vaccination in this population	Yes	Yes	No	Yes	No	Yes	Yes	Yes	Yes	Yes	Yes	Yes	Yes	No	NA	NA	Yes	Yes	Daycare personnel from participating centers distributed the survey to a parent or primary caregiver who met the eligibility criteria.	Daycare personnel from participating centers distributed the survey to a parent or primary caregiver who met the eligibility criteria	Yes	Yes	Conditional logistic regression	No	No	Yes	Yes	NA	Yes	Yes	0.741935
Strelitz, B., 2015	To assess the feasibility of administering the PACV modified for influenza vaccination in a PED setting and to determine whether parental PACV scores were associated with receipt of seasonal influenza vaccine.	Yes	Yes	No	Yes	No	Yes	Yes	Yes	Yes	Yes	Yes	Yes	Yes	No	NA	NA	Yes	Yes	Researchers administered the PACV survey to the parent in the child’s PED exam room.	After obtaining verbal consent from the child’s parent, researchers administered the PACV survey to the parent in the child’s PED exam room.	Yes	No	Multivariable logistic regression models	No	No	Yes	Yes	NA	Yes	Yes	0.709677
Bukhsh, A., 2018	To evaluate the awareness and attitude of general public regarding influenza vaccination in Pakistan	Yes	Yes	No	Yes	No	Yes	Yes	Yes	Yes	Yes	Yes	No	Yes	No	NA	NA	No	Yes	NR	NR	No	No	Relative importance index (RII)	No	No	Yes	Yes	NA	Yes	Yes	0.548387
He, L., 2015	To identify which factors are important for parents’ decision on vaccinating their children against seasonal influenza	Yes	Yes	No	Yes	No	Yes	Yes	Yes	Yes	Yes	Yes	Yes	Yes	Yes	A pilot study was conducted in April 2013 to test the length, comprehensibility, content and face acceptability of the questionnaire	Yes	No	Yes	Each eligible subject was invited to complete a face to_x005f_x001e_ face interview based on a standardized questionnaire.	Each eligible subject was invited to complete a face to_x005f_x001e_ face interview based on a standardized questionnaire.	No	No	Hierarchical logistic regression models	No	No	Yes	Yes	NA	Yes	Yes	0.741935
Wu, A.M., 2015	To investigate prevalence and associated factors of IV status among Chinese children aged 24–59 months in Hong Kong	Yes	Yes	No	Yes	Yes	Yes	Yes	Yes	Yes	Yes	Yes	Yes	Yes	No	NA	NA	Yes	Yes	Telephone survey	Random telephone numbers were selected from up-to-date local telephone directories. selected parent was invited to participate in the study	No	No	Multiple logistic regression	No	No	Yes	Yes	NA	Yes	Yes	0.709677
Smith, L.E., 2017	To test whether attitudes towards influenza and the vaccine, together with parental perception of side-effects, were associated with intention to have their child vaccinated in the 2016–2017 season.	Yes	Yes	No	Yes	No	Yes	Yes	Yes	Yes	Yes	Yes	Yes	Yes	No	NA	NA	Yes	Yes	The market research company Ipsos MORI recruited participants from an existing panel of people willing to take part in internet surveys	The market research company Ipsos MORI recruited participants from an existing panel of people willing to take part in internet surveys	Yes	No	Multivariate logistic regressions	No	No	Yes	Yes	NA	Yes	Yes	0.709677
Liao, Q., 2016	To assess influenza vaccination uptake among target children of the Hong Kong 2012/2013 CIVSS and examine psychosocial factors associated with parents’ decisions regarding their children’s vaccination	Yes	Yes	No	Yes	Yes	Yes	Yes	Yes	Yes	Yes	Yes	NA	Yes	Yes	NR	NR	Yes	Yes	Telephone survey	One eligible subject (mother or father) within a household was invited to complete a telephone interview lasting around 15 min.	Yes	No	Structural equation modeling	No	No	Yes	Yes	NA	Yes	Yes	0.741935
Hwang, J.H., 2017	To characterize parental perception and patterns of action in response to influenza and influenza-like illnesses (ILIs), including vaccination and healthcare use	Yes	Yes	No	No	No	Yes	Yes	Yes	Yes	Yes	Yes	Yes	Yes	No	NA	NA	No	Yes	A trained interviewer conducted the survey	A trained interviewer conducted the survey	Yes	No	χ2 test	No	No	Yes	Yes	NA	Yes	Yes	0.645161
Hofstetter, A.M., 2017	To examine how clinicians communicate with parents about influenza vaccination and the effect of these communication behaviors on parental vaccine decision-making	Yes	Yes	No	Yes	No	Yes	Yes	Yes	Yes	Yes	Yes	Yes	NR	No	NA	NA	No	Yes	NR	NR	No	No	Generalized linear mixed models	No	No	Yes	Yes	NA	Yes	Yes	0.548387
Wu, A.M.S., 2020	This study aimed to tested three hypotheses based on TPB, that: (1) baseline parental behavioral intention of the child’s IV in the next 12 months would predict their actual IV within the 12-month follow-up period; (2) baseline parental attitude, perceived norm, and perceived behavioral control would be associated with baseline parental intention for child’s IV, and predict child’s actual IV with…	Yes	Yes	No	Yes	Yes	Yes	Yes	Yes	Yes	Yes	Yes	Yes	Yes	Yes	Yes	NR	Telephone numbers randomly selected from up-to-date local directories	Yes	Telephone survey	NR	Yes	No	Multiple logistic regression	No	No	Yes	Yes	NA	Yes	Yes	0.774194
Lau, J.T.F., 2021	To investigate the associated factors of parental intention regarding their child’s IV (next 12 months) among parents of ever-vaccinated and never-vaccinated children aged 24 to 59 months in Hong Kong	Yes	Yes	No	Yes	No	Yes	Yes	Yes	Yes	Yes	Yes	Yes	Yes	No	NA	NA	Telephone numbers randomly selected from up-to-date local directories	Yes	Telephone survey	NR	Yes	No	Multiple logistic regression	No	No	Yes	Yes	NA	Yes	Yes	0.677419
Ye, L., 2019	This study aimed to investigate the influencing factors of influenza vaccination in children 6-36 months of age	NA	NA	NA	NA	NA	NA	NA	NA	NA	NA	NA	NA	NA	NA	NA	NA	NA	NA	Through the immunization prevention management information system of Ningbo city	Through the immunization prevention management information system of Ningbo city	NA	NA	Multiple logistic regression	NA	No	No	Yes	NA	Yes	Yes	0.225806
Li, G., 2020	To analyze the influencing factors of influenza vaccination in children under 5 years of age	Yes	Yes	No	No	No	Yes	NA	Yes	Yes	Yes	Yes	NR	Yes	NO	NA	NA	NO	Yes	NR	NR	No	No	Multiple logistic regression	No	No	No	Yes	NA	Yes	Yes	0.451613
Yang, W., 2018	To understand parents' cognition of influenza vaccine, vaccination willingness and influencing factors	Yes	No	No	No	No	Yes	Yes	Yes	Yes	Yes	Yes	Yes	Yes	NO	NA	NA	Yes	Yes	NR	NR	No	No	Multiple logistic regression	No	No	No	Yes	NA	Yes	Yes	0.516129
Mei, M., 2017	To analyze influencing factors of influenza vaccination among children in childcare institutions in Binhai County	Yes	No	No	Yes	No	Yes	NR	NR	Yes	Yes	NR	Yes	NR	NO	NA	NA	Yes	Yes	NR	NR	Yes	No	Multiple logistic regression	No	No	Yes	Yes	NA	Yes	Yes	0.483871
Gao, H., 2014	To analyze influencing factors of influenza vaccination among children aged from 6-50 months	Yes	No	No	No	Yes	NR	NR	NR	NR	Yes	NR	Yes	NR	NO	NA	NA	No	No	Research team members interviewed the parents of children	Research team members interviewed the parents of children	Yes	No	x2 test	No	No	No	No	NA	No	No	0.290323
Chen, X., 2011	To investigate Influenza vaccination status and influencing factors of preschool children in Yuzhong District, Chongqing	Yes	No	No	No	No	NR	NR	NR	NR	Yes	NR	Yes	NR	NO	NA	NA	No	Yes	NR	NR	No	No	Multiple logistic analysis	No	No	No	No	NA	No	No	0.193548
Thanee, C., 2021	To understand the determinants of influenza vaccination in their children	Yes	Yes	No	Yes	Yes	Yes	Yes	Yes	Yes	Yes	Yes	NR	Yes	Yes	No	NR	Yes	Yes	NR	NR	Yes	No	Multiple logistic regression	Medical record	No	Yes	Yes	Yes	Yes	Yes	0.741935
Wu Y., 2020	To understand preschool children's parents' awareness of influenza and their willingness to get influenza vaccine	Yes	No	No	No	No	Yes	Yes	Yes	NR	Yes	NR	Yes	NR	NO	NA	NA	No	Yes	Parents of preschool children in POV were invited to fill the questionnaires	Parents of preschool children in POV were invited to fill the questionnaires	NA	No	Multiple logistic regression	No	No	No	Yes	NA	Yes	Yes	0.451613
Weiwei, L., 2021	To analyze the influenza vaccination of preschool children in Nanshan district of Shenzhen city	Yes	No	No	No	No	Yes	Yes	Yes	NR	Yes	NR	NR	NR	NO	NA	NA	No	Yes	Family members of children in the Maternal and Child Health Hospital of Nanshan District and two kindergartens were invited to fill the questionnaires	Family members of children in the Maternal and Child Health Hospital of Nanshan District and two kindergartens completed the questionnaires	NA	No	T test	No	No	No	No	NA	No	No	0.322581

## Sheet: Supplement 2.2. 
Supplement 2.2. Appraisal – quantitative (Experimental study)
Questions	Did the study address a clearly focused research question?	Was the assignment of participants to interventions randomised?	Were all participants who entered the study accounted for at its conclusion?	Were the participants ‘blind’ to intervention they were given?	Were the investigators ‘blind’ to the intervention they were giving to participants?	• Were the people assessing/analysing outcome/s ‘blinded’?	Were the study groups similar at the start of the randomised controlled trial?	Apart from the experimental intervention, did each study group receive the same level of care (that is, were they treated equally)?	Were the effects of intervention reported comprehensively?	Was the precision of the estimate of the intervention or treatment effect reported?	Do the benefits of the experimental intervention outweigh the harms and costs?	Can the results be applied to your local population/in your context?	Would the experimental intervention provide greater value to the people in your care than any of the existing interventions?	Quality appraisal
Borg, K.,2018	Yes	Yes	Yes	Yes	Can’t tell	Can’t tell	Yes	Yes	Yes	Yes	Yes	Yes	Yes	0.846154
Choi, A.,2017	Yes	NA	Yes	NA	Can’t tell	Can’t tell	NA	NA	Yes	Yes	Yes	Yes	Yes	0.538462

## Sheet: Supplement 2.3.
Supplement 2.3. Appraisal – quantitative (Cohort study)
Questions	1. Did the study address a clearly focused issue?	2. Was the cohort recruited in an acceptable way?	3.Was the exposure accurately measured to minimise bias?	4.Was the outcome accurately measured to minimise bias?	5.Have the authors identified all important confounding factors?	6. Have they taken account of the confounding factors in the design and/or analysis?	7. Was the follow up of subjects complete enough?	8. Was the follow up of subjects long enough?	9. What are the results of this study?	10.How precise are the results?	11. Do you believe the results?	12. Can the results be applied to the local population?	13. Do the results of this study fit with other available evidence?	14. What are the implications of this study for practice?	Quality appraisal
Rao, S.,2019	Yes	Yes	Yes	Yes	Yes	Yes	Yes	Yes	Among 126,763 births meeting criteria for inclusion, 50.2% were vaccinated against influenza by two years of age. Children admitted to the NICU receiving oxygen with 72 h of birth were 20% less likely to be vaccinated (RR = 0.8, 95% CI: 0.67–0.96) after adjusting for maternal age, race/ethnicity, education and preterm birth. Conversely, premature births were associated with an increase in influen…	The results are precise because all the data are from Colorado Birth Registry data and state immunization data	Yes	Can’t Tell	Can’t Tell	Additional studies are warranted to assess factors associated with early influenza vaccination in children, to help target immunization strategies of this vulnerable pediatric population.	0.857143

## Sheet: Supplement 2.4.
Supplement 2.4. Appraisal – qualitative study
Questions	1. Was there a clear statement of the aims of the research?	2. Is a qualitative methodology appropriate?	3. Was the research design appropriate to address the aims of the research?	4. Was the recruitment strategy appropriate to the aims of the research?	5. Was the data collected in a way that addressed the research issue?	6. Has the relationship between Researcher And Participants Been Adequately considered?	7. Have ethical issues been taken into consideration?	8. Was the data analysis sufficiently rigorous?	9. Is there a clear statement of findings?	10. How valuable is the research?	Quality appraisal
Biezen, R., 2018	Yes	Yes	Yes	Yes	Yes	NA	Yes	Yes	Yes	The finding of this research may facilitate the design of more robust interventions and overcome existing barriers of chilfhood influenza vaccination.	0.9
