# Supplementary material for: Factors Influencing Childhood Influenza Vaccination: A Systematic Review
Source: Vaccines (Basel). 2024 Feb 23;12(3):233. doi: 10.3390/vaccines12030233 (PMC10975121; doi:10.3390/vaccines12030233)
Supplement: Supplementary file 1 [file vaccines-12-00233-s001.zip › supplemental table S3.xlsx]

## Sheet: Supplemental.3.1.
Supplemental.3.1. Factors associated with childhood influenza vaccination
First Author	Published Year	Setting	City&Country	Outcome Varible	Denominator	Numerator	Reported Prevalence	Classification of non-biomedical factors	Factor	Category	ORs
Lili Xu	2017	kindergarten	Xining, Qinghai Province, China	Children’s vaccination status	Kindergarten children(aged 2-7 years)(1298)	Children who had been vaccinated for influenza either in 2014–15(148) or 2015–16(154)	11.4%(season 2014–15)&11.9% (season 2015–16)	Caregivers characteristics	Occupation of mothers	housework and other unemployed	Reference
										Enterprise staff	1.86(1.15-3.02)
										Farmers and herdsmen	0.4(0.18-0.91)
										Healthcare worker	2.36(1.09-5.14)
								Caregivers characteristics	Gender(child)	Female	Reference
										Male	1.48(1.09-2.02)
								Knowledge	Knew the dose for children	NO	Reference
										YES	2.14(1.37-3.35)
								Awareness	Children should be vaccinated every year	No	Reference
										Yes	2.34(1.65-3.31)
								Perceived barriers	Vaccination is safe for children	No	Reference
										Yes	1.69(1.2-2.37)
								Perceived benefits	Vaccine is the most effective way to prevent flu	No	Reference
										Yes	1.5(1.09-2.08)
Mabel S.F. Low	2017	Pre-schools	Singapore	Influenza vaccination history in the past	Pre-school student parents (332)	Parents whose children were vaccinated against influenza in the past (105)	0.32	Information sources	Recommended by physician to vaccinate child against influenza	No	Reference
										Yes	PR=2.47 (1.75–3.48)
								Cues to action	Family took pre-travel influenza vaccination	No	Reference
										Yes	PR=1.64 (1.19–2.25)
								Attitudes towards influenza vaccine	Willingness to vaccinate child against influenza		PR=1.59 (1.24–2.04)
								Information sources	Received influenza vaccine information from private GPs	No	Reference
										Yes	PR=1.47 (1.05–2.04)
								Information sources	Received influenza vaccine information from television	No	Reference
										Yes	PR=0.44 (0.23–0.85)
								Perceived barriers	Felt well-informed about inflfluenza vaccine	No	Reference
										Yes	PR=1.44 (1.04–1.99)
Joseph T. F. Lau	2018	Outpatient	Hongkong, China	Influenza vaccination history	Parents of children aged 12–23 months(489)	Parents whose children were vaccinated against influenza in the past (56)	0.115	Knowledge	Knowledge score about governmental policies and recommendation related to IV	0	Reference
										1~2	0.86 (0.34,2.14)
										3~4	2.64 (1.09,6.40)
								knowledge	Knowledge about influenza vaccine requiremen :Children (aged 6 months to less than 6 years) should take up influenza vaccine every year	No / Not sure	Reference
										yes	2.30(1.21,4.38)
								Perceived barriers	Score of safety concerns	0	Reference
										1~2	0.24(0.12,0.47)
										3~4	0.14(0.06,0.33)
								Information sources	Scores of information sources and seeking for therapeutic purposes decisions	0	Reference
										1~2	1.63(0.76,3.46)
										3~5	7.79(3.45,17.58)
								Norms	Subjective norms	0	Reference
										1~2	4.59(2.34,9.00)
								Caregivers characteristics: Vaccination history	Family members ever taken up IV in the past year	No / Do not know	Reference
										Yes	6.60(3.60,12.11)
T. N. OFFUTT-POWELL	2014	Daycare centres	Tarrant County, Texas, USA	Influenza vaccination during the current influenza season	Parents of childrenin the selected daycare centres (124)	Parents' children who received at least one dose of influenza vaccine during the current influenza season (80)	0.65	Perceived barriers	Perceived risk of vaccine-related adverse events	Low	Reference
										Moderate	0.37( 0.10, 1.3)
										High	0.17(0.03, 0.71)
								Information sources	Physician recommendation†	Not recommended	Reference
										Recommended	8.2(2.7, 30)
								vaccination history	Parental prevention behaviours	Low	Reference
										Moderate	1·3 (0·29, 6·2)
										High	9·1 (3·2, 31)
Bonnie Strelitz	2015	Outpatient	Seattle,WA,USA	Acceptance of influenza vaccination	Parents of children(152)	Parents who accepted influenza vaccination for children pediatric emergency department (56)	0.37	Attitude & Perceptions	Scores of Parent Attitudes about Childhood Vaccines (PACV) survey	<50	Reference
										50–100	6.58 (2.03, 21.38)
Allah Bukhsh	2018	Community	Pakistan	Influenza vaccination in the past	Parents of children(532)	Parents'child who received influenza vaccine in the past(35)	0.066	Perceived severity	Influenza is a mild disease and does not need vaccination	/	Not applicable
								Perceived benefits	Vaccine is safe and effective measure to protect your child against influenza	/	Not applicable
								Perceived barriers	I am worried about side effects of the influenza vaccine	/	Not applicable
								Perceived barriers	It is better to have natural immunity against influenza	/	Not applicable
								Attitudes towards influenza vaccine	Healthy young children should not get an influenza vaccine	/	Not applicable
								Awareness	Children who have a chronic disease should get an influenza vaccine	/	Not applicable
								Awareness	My child has had all their routine vaccines	/	Not applicable
								Attitudes towards influenza vaccine	I don't believe that children should have any vaccinations	/	Not applicable
								Self-efficacy	Getting two needles in the first year is difficult to organize	/	Not applicable
								Access	It is inconvenient to get an influenza vaccine	/	Not applicable
								Access	I am too busy to get my child vaccinated against influenza	/	Not applicable
Lei He	2015	Outpatient	Liwan District,Guangzhou, Guangdong province, China	Influenza vaccination within the preceding 12 months	Parents who took their children for regular body check (298)	Parents' children who received vaccination against seasonal influenza within the preceding 12 months (140)	0.47	Caregivers characteristics	Age of child (months)	>24	Reference
										6–24	2.59* (1.44, 4.68)
								Norms	If other parents i know have their children vaccinated against seasonal influenza, it will encourage me to do the same (social norms)	Strongly disagree/disagree/evens	2.08(1.06-4.06)
										Agree/strongly agree
									If my families and friends though that i should take child to vaccinate, I though I should listen to their advice (social norms)	Strongly disagree/disagree/evens
										Agree/strongly agree
									If most parents bring their child to take seasonal influenza vaccination, I feel that I should also do so (social norms)	Strongly disagree/disagree/evens
										Agree/strongly agree
								Self-efficacy	If you do try, how difficult do you think it is for you to take your child for seasonal influenza vaccination in the coming 12 months?	Very difficult/difficult/evens	Reference
										Confident/very confident	2.96† (1.60, 5.50)
								Anticipated regret for vaccinating children	If you vaccinate your child against seasonal influenza, but your child subsequently still got influenza, will you feel that you would regret your decision?	Definitely not regret	Reference
										Slightly regret	0.66 (0.35, 1.25)
										Moderately regret/extremely	0.21 (0.08, 0.52)
Anise M.S. Wu	2015	Community	Hongkong, China	Influenza vaccination within the preceding 12 months	Parents of children (540)	Parents' of children who had ever taken up influenza vaccination(318)	0.589	Perceived susceptibility and severity	Scores of perceived susceptibility and severity	0–6	Reference
										6–10	2.06 (1.41, 3.01)
								Perceived benefits	Scores of perceived benefits	0	Reference
										1–3	1.86 (1.15, 3.02)
										≥4	3.33 (2.18, 5.09)
								Perceived barriers	Scores of perceived barriers	0	Reference
										1–3	0.62 (0.35, 1.08)
										≥4	0.48 (0.25, 0.95)*
								Cue to action	Scores of cue to action	0	Reference
										1–3	2.11 (1.39, 3.21)
										4–5	5.09 (3.02, 8.56)
								Norms	Scores of subjective norm	0	Reference
										≥1	4.81 (3.23, 7.16)**
								Vaccination history	Family members ever taken up IV in the past year	No/do not know	Reference
										Yes	5.81 (3.73, 9.08)
								Emotion	Fear during the H1N1 pandemic	No/do not know	Reference
										Little/moderate/much	2.15 (1.08, 4.26)
Louise E. Smith	2017	Community	England	Influenza vaccination during the 2015–16 flu season	Parents of children (1042)	Parents of children who had received the influenza vaccination this winter(529)	0.528	Attitudes towards influenza vaccine	The vaccination campaign is just about making money for the manufacturers	Disagree	Reference
										Agree	0.23 (0.14–0.38)
								Attitudes towards influenza vaccine	I don’t like [child] having vaccinations in general	Disagree	Reference
										Agree	0.53 (0.34–0.82)
								Perceived susceptibility	If I don’t vaccinate child, then child will get flu	Disagree	Reference
										Agree	4.46 (2.66–7.48)
								Perceived severity	Flu would be a serious illness for [child]	Disagree	Reference
										Agree	1.66 (1.03–2.66)
								Perceived benefits	Having the child flu vaccine is an effective way of preventing from catching flu	Disagree	Reference
										Agree	4.56 (2.58–8.08)
								Perceived barriers	The child flu vaccine has not been tested enough for me to feel it is safe	Disagree	Reference
										Agree	0.16 (0.10–0.26)
								Perceived barriers	The child flu vaccine can cause unpleasant shortterm side-effects	Disagree	Reference
										Agree	0.26 (0.16–0.43)
								Perceived barriers	The child flu vaccine can cause long-term health problems	Disagree	Reference
										Agree	0.26 (0.15–0.42)
								Perceived barriers	Vaccinating [child] against flu each year will overload his/her immune system	Disagree	Reference
										Agree	0.27 (0.16–0.44)
								Perceived barriers	Vaccinating [child] against flu each year is too much of an ongoing time commitment	Disagree	Reference
										Agree	0.59 (0.35–1.00)
								Information sources	A health professional has recommended that [child] should be vaccinated	Disagree	Reference
										Agree	3.61 (2.36–5.50)
								Vaccination history	Child previous flu vaccine	No	Reference
										Yes	15.54 (11.00–21.96)
								Perceived barriers	I don’t know enough about the child flu vaccine	Disagree	Reference
										Agree	0.16 (0.10–0.25)
Qiuyan Liao	2016	Community	Hongkong	Children’s influenza vaccination uptake during the 2012/2013 CIVSS	Parents of children (1226)	Parents'children who received influenza vaccination uptake during the 2012/2013 childhood influenza vaccination subsidy scheme (420)	0.343	Attitude	Vaccination intention	/	β = 0.57
Ji Hyen Hwang	2017		Ansan & Jeonju, South Korea		Parents of children (638)	parents who had immunized their child against influenza in the previous year(615)	0.964	Information sources	Early campaign of government or press	/	ORs not applicable
								Information sources	Recommendation from health care providers	/	ORs not applicable
								Information sources	Recommendation from the family members, acquaintances	/	ORs not applicable
								Information sources	Recommendation from the school or nursery	/	ORs not applicable
								Information sources	Parent’s decision	/	ORs not applicable
								Perceived barriers	Safety concern	/	ORs not applicable
								Perceived barriers	Mistrust in effectiveness	/	ORs not applicable
								Perceived barriers	Having no necessity	/	ORs not applicable
								Access	Cost	/	ORs not applicable
								Access	Lack of time	/	ORs not applicable
								Access	Missed vaccinating season	/	ORs not applicable
Kim Borg	2018	Community	Victoria,Australia	Childhood influenza immunisation between 2 May 2017 and 1 September 2017	Parents of children(5534; group of personalised letter:1845;group of pamphlet:1845; control group:1844)	Parents'children who received influenza vaccination uptake between 2 May 2017 and 1 September 2017 (273; group of personalised letter:109;group of pamphlet:83; control group:81)	Control group:4.4%; pamphlet group: 4.5%; the letter group:5.9%	Information sources	Intervention type	control	Reference
										pamphlet	1.03(0.75-1.40)
										letter	1.33(0.99–1.79)
Suchitra Rao	2019	Community	Colorado,USA	Children’s receipt of at least one influenza vaccination within two years of age	Children in Colorado who are 6 months to 5 years of age (126,763)	Children who received at least one influenza vaccination within two years of age (63,572)	0.502	Caregivers characteristics	Number of Pre-natal visits	/	RR= 0.992 (0.986, 0.998)(Among hispanic mothers)
										/	RR = 0.984 (0.973,0.996)(Among white non-Hispanic, or black non-Hispanic)
								Caregivers characteristics	Admission to the NICU and given supplemental oxygen were 20% less likely to be vaccinated	/	RR = 0.80(0.89, 0.96)
								Caregivers characteristics	preterm birth	/	RR = 1.10(1.05, 1.15)
Anise M.S. Wu	2020	Community	Hongkong, China	Children’s actual IV within the follow-up period	Parents with children (440)	Children who received iunfluenza vaccination within the follow-up period (278)	0.632	Attitude	Behavioral intention regarding the child’s IV in the next 12 months	Very unlikely/Unlikely 1	Reference
										Likely	Never vaccinated at baseline: 6.06(1.59,23.04);Ever-vaccinated at baseline:4.83(1.98,11.80)
										Very likely	Ever-vaccinated at baseline: 7.46 (2.70,20.65)
								Perceived benefit	Positive attitude score	0	Reference
										3~5	Ever-vaccinated at baseline: 3.74 (1.78,7.85)
								Norms	Perceived norm score	0	Reference
										1~2	Ever-vaccinated at baseline: 2.37 (1.26,4.45)
										3	Ever-vaccinated at baseline: 3.55 (1.83,6.89)
Chareeya Thanee	2021	Outpatient	Thailand	Children’s influenza vaccination status	Caregiversof children (700)	Children receiving influenza vaccination in the 2018 season(61)	0.09	Caregivers characteristics	Health insurance coverage during the enrollment visit	Private	Reference
										Out-of-pocket
										Universal coverage	2.6 (1.1–6.6)
										Civil service
								Information sources	Information source about influenza vaccine	Others	Reference
										Healthcare providers	2.8 (1.3–6.0)
								Attitudes towards influenza vaccine	Agreement with ministry of public health’s recommendation for influenza vaccination in young children	Agreed	Reference
										Disagreed
										Strongly disagreed
										Not sure
										Strongly agreed	2.9 (1.5–5.9)
								Vaccination history	Received influenza vaccination in the 2017 influenza season or earlier	No	Reference
										1 dose	3.2 (1.4–7.8)
										> 1 doses
Ye Lixia	2019	Community	Ningbo, Zhejiang, China	Coverage rate of 2 doses of influenza vaccine 2017-18	Children aged from 6-35 monthes	Children who received 2 doses of influenza vaccine during 2017-18 flu season	0.0407	Caregivers characteristics	Months of age	6~12	Reference
										13~24	0.48(0.47-0.50)
										25-35	0.15(0.15-0.16)
								Caregivers characteristics	Residence	Local	Reference
										Migrant	0.53(0.51-0.55)
								Caregivers characteristics	Area	Rural	Reference
										Urban	4.89(4.69-5.09)
								Systematic factor	Frequency of vaccination service (days per week）	<5	Reference
										≥5	1.08(1.03-1.14)
								Systematic factor	Weekend service	No	Reference
										Yes	0.88(0.86-0.91)
								Systematic factor	No. of vaccination staff per 10 000 population	<1	Reference
										≥1	1.20(1.16-1.24)
Li Guangjin	2019	Outpatient	Binzhou,Shandong,China	Children’s vaccination status	Caregiversof children(480)	Parents' children who received vaccination against seasonal influenza(134)	0.279	Knowledge	Knowledge	No	Reference
										Yes	2.24(1.56-3.21)
								Caregivers characteristics	Parents education	Junior high and below	Reference
										Senior high school/technical secondary school/vocational school	1.49(1.08～2.04)
										Undergraduate	2.45(1.61～3.73)
										Graduate school or above	3.9(1.70～8.87)
								Caregivers characteristics	Monthly household income per capita	<3000	Reference
										3000～5999	1.35(1.07-1.71)
										≥6000	2.37 (1.25-4.51)
								Caregivers characteristics	Occupation	Farmers	Reference
										Employees of government enterprises and public institutions	３.15(1.71-5.8)
Weiwei Yang	2018	Community	Nanjing city,Jiangsu, China	Children’s vaccination status	Parents of children (500)	Parents' children who received vaccination against seasonal influenza in 2017(115)	0.23	Caregivers characteristics	Children's gender	Male	Reference
										Female	0.63(0.41～0.99）
								Knowledge	Knowledge status	Poor	Reference
										Good	1.14(1.03～1.27)
								Perceived barriers	Acceptance of vaccines price	Yes	Reference
										No	0.84(0.74～0.96）
								Attitudes towards influenza vaccine	Willingness to accept relevant knowledge training	Yes	Reference
										No	0.53(0.32～0.88)
MaoDong Mei	2017	kindergarten	Binhai,Jiangsu province,China	Children’s vaccination status	Parents of children(2596)	Parents' children who received vaccination against seasonal influenza in 2016(334)	0.1287	Caregivers characteristics	Gender(child)	Female	Reference
										Male	1.46(1.14-1.75)
								Caregivers characteristics	Registered permanent residence	City	Reference
										Rural	1.82(1.47-2.38)
								Caregivers characteristics	Census register	local	Reference
										immigration	1.63(1.42-1.85)
								Caregivers characteristics	Monthly household income	≤2000	Reference
										5001～	0.83(0.68-0.95)
										＞10000	0.59(0.41-0.77)
								Knowledge	Score of influenza Knowledge	/	1.13(1.08-1.21)
Hongcai Gao	2014	NR	Chifeng, inner mongolia, China	Children’s vaccination status	Parents of children(500)	Parents' children who received vaccination against seasonal influenza(98)	0.196	Perceived barriers	Lack of confidence in the vaccine's effectiveness	/	ORs not applicable
								Awareness of vaccination	Parents' awareness of influenza	/	ORs not applicable
								Awareness of vaccination	Lack of parental awareness of influenza	/	ORs not applicable
								Perceived barriers	Vaccine safety concerns	/	ORs not applicable
								Attitude	Wait until there's a flu epidemic	/	ORs not applicable
Xiangang Chen	2011	kindergarten&Outpatient	Yuzhong District, Chongqing, China	Children’s vaccination status	Parents of children(617)	Parents' children who received vaccination against seasonal influenza(98)	NR	Caregivers characteristics	Father's Education	/	1.556
LI Weiwei	2021	kindergarten&Outpatient	Nanshan, Shenzhen	Children’s vaccination status	Parents of children(440)	Parents' children who received vaccination against seasonal influenza in 2018 or 2019(99)	48.31%(2018)&54.11%(2019)	Caregivers characteristics	Hukou Status		ORs not applicable
								Caregivers characteristics	Maternal education		ORs not applicable
								Caregivers characteristics	Monthly household income		ORs not applicable

## Sheet: Supplemental.3.2.
Supplemental.3.2. Factors associated with caregivers' intention to vaccinate their children against influenza
First Author	Published Year	Setting	City&Country	Outcome Varible	Denominator	Numerator	Reported Prevalence	Classification of non-biomedical factors	Factor	Category	ORs
Changhsun Chen	2015	Community	Taiwan,China	Intention of influenza vaccination this year	Parents or main caregivers of young children (1300)	Parents or main caregivers who intend to vaccinate their children against influenza (949)	0.73	caregivers characteristics	Age(parent)	/	1.04(1.01-1.08)
								caregivers characteristics	Average household income (TWD) for a month	<25,000	reference
										25,000 to <45,000 0.67 0.42 1.04 0.8374	0.62(0.33-1.18)
										45,000 to <65,000 0.67 0.43 1.06 0.8959	0.68(0.35-1.31)
										65,000 to <90,000	0.8(0.39-1.65)
										≥90,000	0.41(0.2-0.85)
								Symptoms	Children’s average frequency of having colds for a year	/	1.05(1.01-1.09)
								Perceived benefits	Perceived benefits	/	1.22(1.13-1.33)
								Cue to action	cues to action (catching cold frequently, more peoplearound catching cold, influenza vaccination of friends, advise frommedical personnel, advise from the government, celebrity speakfor, media report)	/	1.3(1.23-1.37)
								caregivers characteristics:Vaccination history	Children ever vaccinated 2010-2011 influenza vaccine or not	No	Reference
										Yes	4.99(3.22-7.73)
								Self-efficacy	Self-efficacy (regardless of busy, other’sopinion, without reminder, out of pocket payment still has con-fidence in doing so)	/	1.25(1.17-1.34)
Yaofeng Han	2019	School	Xiameng,Fujian province, China	Intention of parents to vaccinate their children against influenza under the free policy	Parents of kindergarden children (1211)	Parents intend to vaccinate their children against influenza under the free policy (1031)	1031 (85.1%)	Perceived susceptibility	Perceived susceptibility	/	1.77 (1.2-2.61)
								Perceived benefits	Perceived benefits	/	3.12(1.91-5.08)
								Perceived barriers	Perceived barriers	/	0.38 (0.28-0.51)
								Cue to action	Cues to action	/	3.54(2.5-5.01)
Yanbing Zeng	2019	School	Fujian(Non-free policy)&Taiwan(Free policy) province, China	Intention of parents to vaccinate their children against influenza	Parents with young children in kindergarten (Total:1506;Xiamen:1211 ;Taiwan:295 )	Parents intend to vaccinate their children (Total:1256;Xiamen:1031; Hualian:225)	83.4%, Xiamen:85.1%, Hualian:76.3%	Knowledge	Knowledge scores	<5	Reference
										5~8	Total: 1.74 (1.18-2.56)
								caregivers characteristics	Monthly family income (RMB)	<4000	Reference
										＞16,000	Total: 0.46(0.23-0.93);Free policy:0.07(0.00-0.94)
								Perceived barriers	Safety worry	Less safety worry	Total: 1.35(1.1-1.66);Non-free policy:1.45(1.13-1.86)
								Attitude	Perceived necessity-Influenza vaccination is necessary	/	Total:1.84(1.53-2.22);Non-free policy:1.74(1.39-2.16);Free policy:3.83(2.06-7.16)
								caregivers characteristics	Parents age	<30	Reference
										30–39	Free policy:4.19(1-17.43)
								Perceived susceptibility	Susceptibility	/	Total:1.44(1.09-1.91);Free policy:2.41(1.09-5.35)
								Perceived benefits	Benefits	/	Total: 1.80(1.30-2.50);Non-free policy:1.96(1.31-2.92);Free policy:2.73(1.22-6.12)
								Perceived barriers	Barriers	/	Total: 0.50(0.37-0.68);Non-free policy:0.51(0.35-0.73);Free policy:0.31(0.14-0.68)
								Cues to action	Cues to action	/	Total: 3.32(2.47-4.46);Non-free policy: 3.14(2.16-4.57);Free policy:4.52(2.17-9.43)
								caregivers characteristics	Parents education	Senior high school or below	Reference
										University/college or above	Total:1.54(1.03–2.28)
								caregivers characteristics	Relationship with kids	Father
										Mother	Free policy:4.37(1.37–13.96)
								caregivers characteristics :Vaccination history	Vaccinated during last year	No
										Yes	Free policy:4.52(1.07–19.02)
Aery Choi	2017	Outpatient	Seoul，South Korea	Likelihood of vaccinating their child	Parents who visited the Pediatric Departments of the Korea Cancer Center Hospital and Seoul Eulji Hospital, the Jungnang Borough Office Healthcare Center, and 3 day-care centers in Seoul(639)	Parents who would like to vaccinate their child(534)	0.8357	caregivers characteristics	Sex	Female	Not applicable
										Male	Not applicable
								caregivers characteristics	Highest level of education completed	Less than high school	Not applicable
										More than college degree	Not applicable
								caregivers characteristics	Current employment status	Employed	Not applicable
										Unemployed	Not applicable
								caregivers characteristics	Household income (USD)	≤2,500	Not applicable
										>2,500, ≤4,500	Not applicable
										>4,500	Not applicable
Lei He	2015	Outpatient	Liwan District,Guangzhou, Guangdong province, China	Parental intention to vaccinate their children	Parents who took their children for regular body check (298)	Parents who intend to vaccinate their children against seasonal influenza over the next 12 months (179)	0.601	Cues to action	Perceived healthy status of child	Excellent good/very good	Reference
										Good	3.36 (1.68, 6.74)
										Fair/poor	2.12 (0.75, 6.00)
								caregivers characteristics:Vaccination history	Did your child ever receive seasonal influenza vaccine in the past	No	Reference
										Yes	2.50(1.31, 4.76)
								Perceived control	If you do try, how difficult do you think it is for you to take your child for seasonal influenza vaccination in the coming 12 months? (perceived control)	Very difficult/difficult/evens	Reference
										Confident/very confident	3.21(1.65, 6.22)
								Emotion	In the past 1‑week, have you worried that your child would catch seasonal influenza? (Worry)	Not worry/anxious	Reference
										Worry/anxious	2.31 (1.19, 4.48)
Louise E. Smith	2017	Community	England	Intention to vaccinate child in the 2016-17 season	Parents of children (1042)	Parents who intend to vaccinate child in the 2016-17 season(668)	0.703	Attitude	The vaccination campaign is just about making money for the manufacturers	Disagree	Reference
										Agree	-2.14 (-2.53 to -1.75)
								Perceived benefits	Having the child flu vaccine is an effective way of preventing from catching flu	Disagree	Reference
										Agree	3.43 (3.03– 3.82)
								Perceived barriers	The child flu vaccine has not been tested enough for me to feel it is safe	Disagree	Reference
										Agree	-1.78 (-2.12 to -1.44)
								Perceived susceptibility	If I don’t vaccinate child, then child will get flu	Disagree	Reference
										Agree	2.90 (2.48– 3.31)
								Perceived severity	Flu would be a serious illness for [child]	Disagree	Reference
										Agree	1.40 (0.99– 1.81)
								Perceived barriers	The child flu vaccine can cause unpleasant shortterm side-effects	Disagree	Reference
										Agree	-1.37 (-1.77 to -0.96)
								Perceived barriers	The child flu vaccine can cause long-term health problems	Disagree	Reference
										Agree	-1.83 (-2.22 to -1.45)
								Perceived barriers	Vaccinating [child] against flu each year will overload his/her immune system	Disagree	Reference
										Agree	-1.43 (-1.80 to -1.05)
								Perceived barriers	Vaccinating [child] against flu each year is too much of an ongoing time commitment	Disagree	Reference
										Agree	-0.48 (-0.94 to -0.03)
								Information sources	A health professional has recommended that [child] should be vaccinated	Disagree	Reference
										Agree	1.11 (0.72– 1.49)
								caregivers characteristics:Vaccination history	Child previous flu vaccine	No	Reference
										Yes	2.25 (1.94– 2.57)
								Attitude	I don’t like [child] having vaccinations in general	Disagree	Reference
										Agree	-1.34 (-1.73 to -0.95)
								Self-efficacy	I don’t know enough about the child flu vaccine	Disagree	Reference
										Agree	-1.08 (-1.45 to -0.70)
								Perceived barriers	The child flu vaccine does not suit my religious or cultural beliefs/values	Disagree	Reference
										Agree	-0.55 (-1.02 to -0.09)
								Perceived severity	Flu would be a serious illness for me	Disagree	Reference
										Agree	0.97 (0.60– 1.35)
								Perceived severity	Flu would be a serious illness for someone living in [child]’s household	Disagree	Reference
										Agree	1.27 (0.88– 1.66)
								Information sources	Another child I know had side-effects from the vaccine	Disagree	Reference
										Agree	-0.83 (-1.21 to -0.44)
								Perceived barriers	Perception of side-effects	No	Reference
										Yes	_x0001_-0.53 (-0.79 to -0.26)
								Perceived barriers	Severity of side-effects	Very mild	Reference
										Mild	-0.63 (_x0001_-1.18 to _x0001_-0.08)
										Moderate	—1.59 (—2.27 to —0.91)
										Severe	—2.02 ( —3.46 ( —0.58)
Qiuyan Liao	2016	Community	Hongkong	Intention to vaccinate child	Parents of children (1226)	Parents' intention to vaccinate children during the 2012/2013 childhood influenza vaccination subsidy scheme (794)	0.576	caregivers characteristics:Vaccination history	Parents who had previously vaccinated their child	/	β = 0.42
								caregivers characteristics:Vaccination history	Parental past flu vacciantion history	/	β = 0.22
								Emotion	Perceived regret from vaccinating	/	β = −0.14
								Perceiver barrier	Perceived higher belief in vaccination safety	/	β = 0.35
								Norms	Perceived greater social norms influence	/	β = 0.25
								Emotion	Anticipated more regret from not vaccinating	/	β = 0.17
								Perceived susceptibility	Perceived higher risk to child from influenza	/	β = 0.15
Annika M. Hofstetter	2017	Outpatient	Seattle，USA	Parental verbal acceptance of influenza vaccine for their child	Parents of young children(50)	Parents who accepted influenza vaccine for their child by the visit’s end (24)	0.48	Cue to action	Clinicians communication format	participatory format	Reference
										presumptive format	48.2( 3.5 to 670.5)
Anise M.S. Wu	2020	Community	Hongkong, China	Parental intention regarding the child’s IV in follow-up period	Parents with children (440)	Parents who intended to vaccinate children against influenza in follow-up period	48.8% (Likely + Very likely)	Perceived benefits	Positive attitude score	0	Reference
										3~5	Never vaccinated at baseline:7.11 (2.25,22.47);Ever vaccinated at baseline: 5.28 (2.57,10.85)
								Norms	Perceived norm score	0	Reference
										1~2	Never vaccinated at baseline: 3.94(1.47,10.56);Ever vaccinated at baseline: 2.90(1.51,5.59)
										3	Never vaccinated at baseline:27.40(6.29,119.40);Ever vaccinated at baseline: 21.76 (7.63,62.04)
Joseph T. F. Lau	2020	Community	Hongkong, China	Parental behavioral intention regarding the child’s influenza vaccination in the next year	Parents with children (540)	Parents who intend to vaccinate children against influenza in the next year (263)	0.487	caregivers characteristics: Vaccination history	Family members have taken up IV in the past year	No/do not know	Reference
										Yes	Ever-vaccinated group: 1.79 (1.09-2.96)
								Perceived susceptibility	Perceived susceptibility score of H1N1 flu	0-5	Reference
										6~10	Ever-vaccinated group: 3.20 (1.07-9.54)
								Perceived benefits	No. of responses reflecting perceived benefit	0	Reference
										≥4	Ever-vaccinated group:4.77 (2.52-9.05);Never-vaccinated group: 8.85 (3.36-23.34)
								Perceived barriers	No. of responses reflecting perceived barrier	0	Reference
										≥3	Ever-vaccinated group:0.38 (0.17-0.84)
								Cue to action	No. of responses reflecting cues to action	0	Reference
										3~4	Ever-vaccinated group: 3.57 (1.88-6.78)
								Norms	No. of responses reflecting subjective norms	0
										1~2	Ever-vaccinated group: 11.23 (6.17-20.46);Never-vaccinated group: 21.66 (9.25-50.71)
WU Yating	2020	Outpatient	Xinxiang, Henan	Parental behavioral intention regarding the child’s influenza vaccination	Parents with preschool children(340)	Parents who intend to vaccinate children against influenza (217)	0.6832	Caregivers characteristics	Parental education	/	1.897(1.228～2.931)
								Cue to action	Has child ever had the flu	Yes	2.468（1.400～4.351）
								Vaccination history	Have child been vaccinated in previous years	Yes	4.242（2.473～7.275）
